# Supplementary material for: Numerical simulations of oceanic oxygen cycling in the FAMOUS Earth-System model: FAMOUS-ES, version 1.0
Source: Copernicus journal article supplement (doi:10.5194/gmd-7-1419-2014), 2014-07-15
Supplement: Supplementary file 1 [file supplement-cover-letter.pdf › supplement-cover-letter.pdf]

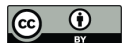

*Supplement of*

## **Numerical simulations of oceanic oxygen cycling in the FAMOUS Earth-System model: FAMOUS-ES, version 1.0**

**J. H. T. Williams et al.**

*Correspondence to:* J. H. T. Williams ([jonny.williams@bristol.ac.uk](mailto:jonny.williams@bristol.ac.uk))

- [Supplement-Cover-Letter.pdf](#)
- [oxygen.mod-GMD-2.txt](#)
